# Supplementary material
Source: PubMed Central journal article supplement (PMC10527201)
Supplement: NIHMS1907400-supplement-2.pdf [file NIHMS1907400-supplement-2.pdf]

**Supplementary Table 2. Molecular features of the main proteins downregulated in CECs from *Dhps*<sup>Δepi</sup> mice.**

| Proteins | Fold change<br>( <i>Dhps</i> <sup>Δepi</sup> / <i>Dhps</i> <sup>fl/fl</sup> ) | nnnnn <b>AAAUGU</b> nnnnn<br>sequence in mRNA <sup>a</sup>                                                                                                                                                                                                                                                                                                                                                                                                       | Number of<br>diprolyl motifs | Number of<br>diglycyl motifs |
|----------|-------------------------------------------------------------------------------|------------------------------------------------------------------------------------------------------------------------------------------------------------------------------------------------------------------------------------------------------------------------------------------------------------------------------------------------------------------------------------------------------------------------------------------------------------------|------------------------------|------------------------------|
| AL1A7    | 0.4796                                                                        | UCAAG <b>AAAUUU</b> UGAGG<br>GCCUU <b>AAAUGC</b> GCAGA<br>GUUCA <b>GAUGUCUGGAAA</b><br><b>UGG</b> GAGAG <b>AAAUGG</b> GUGA<br>UUU <b>AAAAUGCCAAAC</b><br>GUAUAG <b>AAUGUGAAAUG</b><br><b>AAGA</b> UU                                                                                                                                                                                                                                                             | 1                            | 4                            |
| AL1B1    | 0.4829                                                                        | CGGGC <b>GAUGU</b> GGAUC<br>GGGC <b>AAAUCUG</b> AUUU<br>UUUG <b>AAAUGU</b> UGUGG                                                                                                                                                                                                                                                                                                                                                                                 | 1                            | 3                            |
| AL3A2    | 0.8292                                                                        | GAAGG <b>AAUCU</b> UAGCA<br>UGAGC <b>AAAGU</b> GAACU<br>GCAGG <b>AAAUGC</b> UGCCA<br>CUUAC <b>GAUGU</b> UGAUC<br>AGAAG <b>AAUUU</b> UGGA<br>GUG <b>AAAAUGU</b> AGACG<br>UUCAU <b>AAUGA</b> CCGUG<br>CUACU <b>AAAUGC</b> UUAAC<br>UUCAC <b>GAUGU</b> ACUGC<br>GAGCC <b>AAUCU</b> CCGCA<br>CGAGAA <b>CAUGU</b> CACAC<br>AAGUUG <b>AAUGU</b> UUUGU<br>CAAGG <b>AAUUU</b> ACUU<br>UUAUUG <b>AAUGU</b> AUAGC<br>AAUUU <b>CAAUGU</b> GAAC<br>AAAAU <b>AAAUGU</b> AUUUC | 1                            | 5                            |
| AL3B2    | 0.8408                                                                        | AGCCA <b>GAUGU</b> CUGCU<br>AACAC <b>AAUUU</b> GACUA<br>GAAUCA <b>GAUGU</b> GGAA<br>UUCUG <b>GAUGU</b> UUUCUG <b>A</b><br><b>AUGU</b> ACCCG<br>CAGGC <b>GAUGU</b> AUACC<br>CUAUU <b>AAAUGA</b> CCUCA                                                                                                                                                                                                                                                             | 1                            | 6                            |
| AL9A1    | 0.8292                                                                        | GUAAG <b>AAAAGU</b> GGCCU<br>CAUGG <b>GAUGU</b> CCGCU<br>GGGGC <b>AAUCU</b> CCUCU<br>UUCAU <b>AAAUGA</b> GGUUG<br>AACUA <b>UAAUGU</b> CAGCC<br>UUUG <b>AAAUGU</b> GCACA<br>GAGAA <b>UAUGU</b> AGACC                                                                                                                                                                                                                                                              | 1                            | 6                            |
| ALDH2    | 0.5703                                                                        | UCCUG <b>AAAUGU</b> CUCCG<br>CAGGAG <b>AAUGU</b> GUAUG<br>CUAU <b>AGAUGU</b> CAGGG<br>CGUCC <b>GAUGU</b> GCAGG<br>GCAGC <b>AAAUGA</b> GCAAU                                                                                                                                                                                                                                                                                                                      | 1                            | 3                            |
| GSTA4    | 0.5284                                                                        | GAUUG <b>CAUGU</b> AUGCA                                                                                                                                                                                                                                                                                                                                                                                                                                         | 1                            | 0                            |

|        |        |                                                                                                                                               |   |    |
|--------|--------|-----------------------------------------------------------------------------------------------------------------------------------------------|---|----|
|        |        | AUGACAAAUGCCAAUU                                                                                                                              |   |    |
| GSTK1  | 0.7578 | AGUAUAAAUGCCAUGC<br>GGCUGGAAUGUCCACA<br>CCUGCAAAUAUGGGGC<br>AACCUACAUGUUAUUU                                                                  | 2 | 0  |
| GSTM1  | 0.3868 | UGAGAAAUGAAGCUC                                                                                                                               | 0 | 0  |
| GSTM2  | 0.4796 | UGGAGGAAUGUACUAG                                                                                                                              | 0 | 0  |
| GSTM3  | 0.4862 | AAGAGUAUGUCAUGG<br>UGAGAAAUGAAGCUC                                                                                                            | 0 | 0  |
| GSTM5  | 0.6070 | GCCCAAAUGUCAUCC<br>GCACAACAUGUGUGGU                                                                                                           | 0 | 0  |
| GSTO1  | 0.4474 | UACUUAAAUCUCUACC<br>UCAGCAAAUGCUGUUU<br>AAGAAAAAUGUCAAGU<br>UCAUUAAAUCUCUUAU                                                                  | 2 | 1  |
| GSTP1  | 0.4632 | GCGGCAAAUAUGUCAC<br>CCGGAAACAUGUGAACC                                                                                                         | 1 | 1  |
| GSTT2  | 0.6551 | CAAGAAAUGUUACCA                                                                                                                               | 1 | 0  |
| GSTT3  | 0.5743 | CUGCAAAUCUUUGAG<br>UAUAUACAUGUAUAUA                                                                                                           | 2 | 0  |
| K1C16  | 0.3922 | CCUGGAAAUGCAGAUU<br>GACGUCAAUGUGGAGA<br>CGCAGAGAUGUGGAGG<br>GGGACUAAUGUUUUGC                                                                  | 1 | 11 |
| K2C6A  | 0.2284 | CAGUGCAAUGUGUGGA<br>AGAGCAAAUAUGAAGA<br>AGACUAAAUAUGAGGA<br>CUCAUGAAUGUCAAGC<br>GUCCCAGAUGUCAUGG                                              | 1 | 15 |
| K2C79  | 0.5175 | CCUCUCAAAUGUGGAGA<br>CAGACCAAUGUGUCUG<br>AGACCAAAUAUGAAGA<br>ACUAAAAAUGAGAUCG<br>GGCUCAAAUCUACUCA                                             | 1 | 13 |
| LANCL1 | 0.6328 | CUCCACAAUGUGUUUG                                                                                                                              | 1 | 0  |
| MPTX   | 0.0877 | GUGGAAAUAUAGGAGAA<br>UACAUGUUCUAU<br>CCCACAAAUCUCCUG<br>GGGGGAAAUUUUGAUG<br>CUAUGAAAUAUAAGUC<br>UGUUAAAAUGAUAUGUG<br>CAUU<br>CAAAGAAAUGAGCAUC | 0 | 2  |
| S26A3  | 0.3208 | AGGCAAAUGAUCGAA<br>ACAGAAAUGACUCGU<br>UUGGCUAAUGUUGGAA<br>UUUUUAGAUGUCCAUC<br>AAUACAAAUGGAGGAC<br>AUCGGGAAUGUCAGGU                            | 2 | 2  |

\*Substitutions are indicated in red.
