# Supplementary material
Source: PubMed Central journal article supplement (PMC10527201)
Supplement: NIHMS1907400-supplement-6.pdf [file NIHMS1907400-supplement-6.pdf]

**Supplementary Table 6. List of oligonucleotides.**

|                                   |                          |
|-----------------------------------|--------------------------|
| Human <i>Dhps</i> (F)             | CCGTGAGACCATTCGCTAC      |
| Human <i>Dhps</i> (R)             | GAGGCTAAACTCGCCCAAG      |
| Human <i>Dhps</i> _SC (F)         | TTCCAAGCAACCAACTTCG      |
| Human <i>Dhps</i> _SC (R)         | CCCTCTGTGTTCTGCTCCA      |
| Murine <i>Dhps</i> (F)            | CTTCCAGGCTACCAACTTCG     |
| Murine <i>Dhps</i> (R)            | GAGTCAGGTCTGCGTGATGA     |
| Murine <i>Tnf</i> (F)             | CTGTGAAGGGAATGGGTGTT     |
| Murine <i>Tnf</i> (R)             | GGTCACTGTCCCAGCATCTT     |
| Murine <i>Nos2</i> (F)            | CACCTTGGAGTTCACCCAGT     |
| Murine <i>Nos2</i> (R)            | ACCACTCGTACTTGGGATGC     |
| Murine <i>Cxcl2</i> (F)           | GCCAAGGGTTGACTTCA        |
| Murine <i>Cxcl2</i> (R)           | TGTCTGGGCGCAGTG          |
| Murine <i>Il1b</i> (F)            | ACCTGCTGGTGTGTGACGTTCC   |
| Murine <i>Il1b</i> (R)            | GGGTCCGACAGCACGAGGCT     |
| Murine <i>Ifng</i> (F)            | GGCCATCAGCAACAACATAAGCGT |
| Murine <i>Ifng</i> (R)            | TGGGTTGTTGACCTCAAACCTGGC |
| Murine <i>Il17</i> (F)            | ATCCCTCAAAGCTCAGCGTGTC   |
| Murine <i>Il17</i> (R)            | GGGTCTTCATTGCGGTGGAGAG   |
| Murine <i>Nqo1</i> (F)            | TTCTCTGGCCGATTCAGAGT     |
| Murine <i>Nqo1</i> (R)            | GGCTGCTTGGAGCAAAATAG     |
| Human/Murine <i>ACTB/Actb</i> (F) | CCAGAGCAAGAGAGGTATCC     |
| Human/Murine <i>ACTB/Actb</i> (R) | CTGTGGTGGTGAAGCTGTAG     |
